1 **Title Page**

2 **Title: Anamnestic Humoral Correlates of Immunity Across SARS-CoV-2 Variants of**  
3 **Concern**

4  
5

6 Authors: Ryan P. McNamara <sup>1, \*</sup>, Jenny S. Maron <sup>1, \*</sup>, Harry L. Bertera <sup>1</sup>, Julie Boucau <sup>1</sup>,  
7 Vicky Roy <sup>1</sup>, Amy K. Barczak <sup>1,2,3</sup>, “The Positives Study Staff” <sup>2,5</sup>, Nicholas Franko <sup>4</sup>,  
8 Jonathan Z. Li <sup>3,5</sup>, Jason S. McLellan <sup>6</sup>, Mark J. Siedner <sup>2,3</sup>, Jacob E. Lemieux <sup>2,3,7</sup>, Helen  
9 Y. Chu <sup>4</sup>, Galit Alter <sup>1,#</sup>

10

11 **Affiliations:**

12 <sup>1</sup> Ragon Institute of MGH, MIT, and Harvard, Cambridge, MA, USA

13 <sup>2</sup> Department of Medicine, Massachusetts General Hospital, Boston, MA, USA

14 <sup>3</sup> Harvard Medical School, Boston, MA, USA

15 <sup>4</sup> Division of Allergy and Infectious Diseases, University of Washington, Seattle, WA, USA

16 <sup>5</sup> Department of Medicine, Brigham and Women's Hospital

17 <sup>6</sup> Department of Molecular Biosciences, University of Texas at Austin, Austin, TX, USA

18 <sup>7</sup> The Broad Institute, Cambridge, MA, USA

19

20

21 # Correspondence: [helenchu@uw.edu](mailto:helenchu@uw.edu), [jlemieux@partners.org](mailto:jlemieux@partners.org), and  
22 [galter@mgh.harvard.edu](mailto:galter@mgh.harvard.edu)

23

24 **Keywords: Vaccines, COVID-19, breakthrough, SARS-CoV-2, Omicron, Delta, antibodies**

25

26

27 **Abstract**

28 While immune correlates against SARS-CoV-2 are typically defined at peak  
29 immunogenicity following vaccination, immunologic responses that expand selectively  
30 during the anamnestic response following infection can provide mechanistic and detailed  
31 insights into the immune mechanisms of protection. Moreover, whether anamnestic  
32 correlates are conserved across VoCs, including the Delta and more distant Omicron  
33 variant of concern (VoC), remains unclear. To define the anamnestic correlates of  
34 immunity, across VOCs, we deeply profiled the humoral immune response in individuals  
35 recently infected with either the Delta or Omicron VoC. While limited acute N-terminal  
36 domain and RBD-specific immune expansion was observed following breakthrough, a  
37 significant immunodominant expansion of opsonophagocytic Spike-specific antibody  
38 responses focused largely on the conserved S2-domain of SARS-CoV-2 was observed 1  
39 week after breakthrough infection. This S2-specific functional humoral response  
40 continued to evolve over 2-3 weeks following both Delta and Omicron breakthrough  
41 infection, targeting multiple VoCs and common coronaviruses. These responses were  
42 focused largely on the fusion peptide 2 and heptad repeat 1, both associated with  
43 enhanced rates of viral clearance. Taken together, our results point to a critical role of  
44 highly conserved, functional S2-specific responses in the control of SARS-CoV-2  
45 infection, across VOCs, and thus humoral response linked to virus attenuation can guide  
46 next-generation generation vaccine boosting approaches to confer broad protection  
47 against future SARS-CoV-2 VoCs.

## 48 Introduction

49

50 Despite the remarkable vaccine efficacy observed in phase 3 SARS-CoV-2  
51 vaccine trials, the waning of vaccine-conferred immunity and the emergence of  
52 neutralizing antibody-resistant variants of concern (VoCs), such as the Delta (B.1.612)  
53 and Omicron (B.1.529), led to a rapid increase in transmission events globally (1-4). Yet,  
54 severe disease and death did not increase concomitantly suggesting that additional post-  
55 transmission blocking immune responses contribute to control and clearance of infection  
56 once it has occurred (5). However, the precise immunologic correlates of immunity,  
57 following breakthrough infections remain incompletely defined. Moreover, whether these  
58 correlates differ across VOCs, that exhibit striking differences in sequence, is unclear.

59 Neutralizing antibody responses were tightly linked to protective immunity in early  
60 mRNA vaccine phase 3 trials, at a time when the dominant circulating strain was largely  
61 matched to the vaccine antigen-insert sequence (6-8). However, with the introduction of  
62 more neutralization-resistant VoCs, the predictive power of neutralization diminished (2).  
63 Despite VoC evasion of neutralization (9-11), both T-cells (12) and binding antibodies  
64 (13) were proposed as alternate immune mechanisms that could mediate post-treatment  
65 control and clearance of infection. Post-challenge correlates analyses in non-human  
66 primate vaccine models pointed to a rapid humoral anamnestic response, linked to the  
67 rapid expansion of antibody-secreting cells within the respiratory tract, giving rise to  
68 robust renewed pools of antibodies that may contribute to control and clearance of  
69 infection (14). Yet, whether these antibodies contribute to attenuation of disease via the  
70 simple neutralization and blockade of further spread or via the recruitment of the antiviral  
71 activity of the local immune system, via Fc-effector functions, is unknown. Moreover,  
72 whether the specificity and functional activity of the anamnestic response that evolves  
73 following VoC infections are conserved may point to common or distinct mechanisms of  
74 attenuation of disease.

75 Thus, while vaccine-induced immune correlates of protection are most often  
76 focused on the identification of immunologic responses at peak-immunogenicity, these  
77 immunologic markers may have limited consequence as mechanistic correlates of  
78 immunity, as these responses may wane at the time of environmental exposure.  
79 Conversely, immunologic signatures following exposure may provide critical insights into  
80 the anamnestic response that is key to control and clearance of the infection. Thus, here  
81 we deeply profiled the humoral immune response in a cohort of individuals with a recent,  
82 documented Delta or Omicron SARS-CoV-2 infection. Systems Serology profiling  
83 revealed a rapid expansion of Fc-receptor binding and opsinophagocytic humoral immune  
84 responses across the VoC breakthroughs with a consistent preference for expansion for  
85 the S2 subdomain of Spike, focused on the fusion peptide 2 and heptad repeat 1, that  
86 tracked with enhanced viral clearance. These data point to a critical role for S2-specific  
87 immunity as a key correlate of immunity across VoCs breakthrough infections.

## 88 Results

### 89 *Breakthrough COVID-19 Elicits Spike Sub-domain Humoral Responses*

90 The perpetual emergence of new SARS-CoV-2 variants of concern have led to  
91 repeated waves of viral breakthrough infections, even in recently vaccinated individuals  
92 (5). However, vaccine-induced immunity continues to provide protection against severe  
93 disease and death, as evidenced by the severe disease caused by both Delta and  
94 Omicron preferentially in unvaccinated populations (4, 15-17). Emerging data point to the  
95 potential importance of the anamnestic response as a key contributor to the resolution of  
96 infection (18). Given the association between non-neutralizing antibody effector profiles  
97 and natural resolution of severe disease (19), we performed systems serology on sera  
98 from individuals who had completed their vaccine series and had subsequent  
99 documented Delta (n = 37) or Omicron (n = 23) VoC breakthrough, both 1 week and 2-3  
100 weeks post-infection (means =  $6.3 \pm 2.8$ , and  $18.8 \pm 2.9$  days, respectively) aimed at  
101 defining the specific humoral properties associated with the resolution of infection. All  
102 individuals had received the primary 2 dose series of an mRNA vaccine (Pfizer/BNT162b2  
103 = 24, and Moderna mRNA-1273 = 16). Delta and Omicron breakthroughs ranged from 5  
104 – 357 days from vaccination and 0 – 12 days from symptom onset. Given the significant  
105 antigenic distance between Delta and Omicron within the Spike protein, we also sought  
106 to define whether anamnestic correlates were consistent across VoCs (20).

107 The rapid expansion of Spike-specific, receptor-binding domain (RBD) and N-  
108 terminal domain (NTD) specific immune responses have been proposed as potential  
109 acute anamnestic correlates of immunity following vaccine breakthrough. However, no  
110 expansion was observed in IgG responses to the full-length Spike-specific, NTD, or RBD  
111 within the first week following breakthrough infection. Moreover, *de novo* IgM, IgG3, and  
112 IgA responses to full Spike were also not observed (**Figure 1A-C**). Conversely, IgM  
113 responses expanded to the conserved S2 domain of the Spike antigen within the first  
114 week following both Delta and Omicron breakthroughs. Interestingly, S2-specific IgA also  
115 expanded following Delta (**Figure 1D**), but not Omicron breakthrough. These data point  
116 to an unexpected, and selective expansion of *de novo* humoral immune responses to the  
117 highly conserved S2 domain of the Spike antigen as a key correlate of immunity following  
118 vaccine breakthrough infection.

119 After 2-3 weeks, a broader expansion was observed in the full Spike-specific IgG1  
120 response compared to uninfected vaccinees in both Delta and Omicron breakthrough  
121 infection. Spike-specific IgG3 and IgA responses increased compared to the initial post-  
122 breakthrough timepoint (**Figure 1A**) but were not higher than levels observed in controls.  
123 A similar IgG1 RBD-specific expansion was observed across both Delta and Omicron  
124 cases after 2-3 weeks of infection (**Figure 1B**). Limited expansion was observed in NTD  
125 across isotypes and was exclusively observed in Delta breakthroughs (**Figure 1C**), likely  
126 associated with the greater conservation in NTD across the vaccine insert and the Delta  
127 NTD sequence. Conversely, 2-3 weeks post-breakthrough, a highly significant expansion  
128 was observed in the S2-specific response in IgG1, IgG3, IgM, and IgA1, over time as well  
129 as compared to uninfected controls (**Figure 1D**). These data point to a highly selective  
130 and preferential continued anamnestic maturation of the S2-specific response following  
131 both Delta and Omicron breakthrough infections in vaccinees.

132 Binding antibodies alone do not mediate immunologic clearance, thus we next  
133 probed whether the anamnestic expansion of antibodies also possessed the ability to bind

134 to Fc-receptors (FcR), key to leveraging non-neutralizing innate immune effector  
135 functions (21, 22). Interestingly, after 7 days of infection, FcR binding antibodies did not  
136 emerge to most regions of the Spike antigen. However, a significant Spike-specific  
137 Fc $\gamma$ R3B binding response was detected in Delta breakthroughs (**Figure 1E**), and a trend  
138 towards significance was noted to the S2-domain in both Delta and Omicron breakthrough  
139 cases (**Figure 1H**).

140 However, 2-3 weeks following breakthrough, Spike-specific antibodies able to bind  
141 to FcRs expanded in both individuals that experienced a Delta and Omicron breakthrough  
142 (**Figure 1E**). An expansion of activating, opsinophagocytic Fc $\gamma$ R2A and inhibitory Fc $\gamma$ R2B  
143 binding RBD-specific antibodies was observed in both Delta and Omicron breakthroughs  
144 (**Figure 1F**). A more limited expansion of inhibitory Fc $\gamma$ R2B and neutrophil-specific  
145 Fc $\gamma$ R3B binding NTD-specific antibodies was observed (**Figure 1G**). Conversely, S2-  
146 specific FcR binding expanded highly significantly across all FcRs (**Figure 1H**).  
147 Collectively, these data point to an expansion of FcR binding to several Spike  
148 subdomains, including a selective expansion across isotype, subclass, and FcR binding  
149 to the highly conserved S2-domain of the Spike antigen (Supplementary Figure 1).

150

### 151 *Recognition of S2 is Expanded in Breakthrough Cases*

152 To next directly compare the extent of the anamnestic expansion across Spike  
153 domains across the breakthrough cases, we examined the fold increase in IgG1 levels  
154 across subdomains of Spike, VoCs, and common human coronaviruses (HCoVs). While  
155 humoral immune responses increased to all domains in Delta breakthroughs a clear and  
156 more significant expansion was observed in S2-specific IgG1 titers (**Figure 2A**). A similar  
157 highly significant expansion was observed in S2-specific IgG1 responses in Omicron  
158 breakthroughs; however a more limited expansion was observed in RBD and NTD-  
159 specific responses, likely due to greater sequence disparity between the original vaccine  
160 antigen and Omicron within these domains (**Figure 2B**). These data point to S2 as the  
161 immunodominant anamnestic target of the humoral immune response following Delta and  
162 Omicron breakthrough.

163 Comparison of the breadth of the fold anamnestic expansion across Spike VoCs  
164 pointed to an overall similar expansion of response to all VoCs in Delta breakthrough  
165 cases (**Figure 2C**), with the exception of the Alpha variant Spike-specific response that  
166 expanded preferentially. Conversely, all VoC Spike-specific responses expanded  
167 significantly in Omicron breakthrough infection (**Figure 2D**), likely due to the highly  
168 divergent nature of the Omicron spike that drove enhanced B cell recruitment and affinity  
169 maturation. Moreover, analysis of responses to two common human coronaviruses  
170 (HCoVs),  $\alpha$  (229E) and  $\beta$  (OC-43), revealed a selective expansion of cross- $\beta$ -CoV  
171 immunity in Delta and Omicron breakthrough cases, likely due to the closer phylogenetic  
172 relation of  $\beta$ -CoV to SARS-CoV-2, particularly in the S2-domain (23) (**Figure 2E-F**).  
173 Moreover, analysis of the overall humoral coordination within the SARS-CoV-2 responses  
174 revealed similar expansion profiles across Delta and Omicron breakthroughs  
175 (Supplementary Figure 2). Thus, overall, breakthroughs of Delta or Omicron VoCs are  
176 associated with similar anamnestic immunity, marked by a novel expansion of cross-VoC  
177 and  $\beta$ -CoV immunity, likely directed at the conserved S2 region of SARS-CoV-2.

178

### 179 *S2 is the Subdomain that Drives Humoral Expansion Post-breakthrough*

180 To next define a minimal multivariate signature of Delta or Omicron breakthrough  
181 infection among vaccinated individuals, we performed partial least squares discriminant  
182 analysis (PLS-DA) on antibody responses collected in breakthrough cases 2-3 weeks  
183 following infection. Significant heterogeneity was observed in multivariate antibody  
184 profiles across Delta (**Figure 3A**) and Omicron (**Figure 3B**) breakthrough cases  
185 compared to uninfected vaccinated controls. In fact, vaccinated controls demonstrated a  
186 highly homogeneous antibody profile, with controls consistently clustering in a small area  
187 of the multivariate space in both comparisons (**Figure 3A-B**). Conversely, both Delta  
188 breakthrough (**Figure 3A**) and Omicron breakthrough (**Figure 3B**) segregated nearly  
189 completely from uninfected control profiles based on Fc-profiling data. To gain further  
190 insights into the specific features that were most distinct across breakthrough and  
191 uninfected vaccine profiles, a variable importance plot was generated, highlighting the  
192 minimal features that were required to resolve antibody profiles (**Figure 3C**). Strikingly,  
193 of the NTD-specific antibody responses, only NTD-specific IgA responses were  
194 preferentially enriched among both Delta and Omicron breakthroughs. Conversely,  
195 distinct RBD-specific FcR binding responses, but not isotype titers, were highly  
196 discriminatory of breakthrough cases compared to vaccinated controls, marked by higher  
197 RBD-specific Fc $\gamma$ R3B and Fc $\gamma$ R2A in Omicron breakthroughs and Fc $\gamma$ R3A and Fc $\gamma$ R2B  
198 responses selectively expanded in Delta breakthroughs.

199 Instead, both S2-specific isotype titers and FcR binding antibodies were  
200 preferentially expanded across Delta and Omicron breakthrough cases compared to  
201 uninfected vaccinees. Specifically, a coordinated expansion of neutrophil-specific  
202 Fc $\gamma$ R3B and opsinophagocytic Fc $\gamma$ R2A binding antibodies was selectively expanded in  
203 both Delta and Omicron breakthrough profiles. Additionally, S2-specific IgM and IgA  
204 responses expanded preferentially in Omicron breakthroughs, and IgG3, Fc $\gamma$ R3A, and  
205 Fc $\gamma$ R2B levels were selectively observed in Delta breakthrough cases. Moreover, a near-  
206 identical pattern of S2 expansion was observed in a second, independent cohort across  
207 Delta and Omicron breakthroughs after 14 days (Supplementary Figure 3). These data  
208 collectively, highlight the broader selective expansion of functional FcR binding  
209 responses, largely focused on S2, across both Delta and Omicron breakthrough  
210 infections.

### 211 *Breakthrough infection drives a functional S2-specific humoral immune expansion*

212 Whether the expansion of S2-specific immunity is simply a biomarker of exposure  
213 to the virus or a mechanistic correlate of immunity is unclear. However, binding alone is  
214 insufficient to drive antiviral control or clearance, thus we next aimed to determine the  
215 functional capacity of the breakthrough anamnestic response. Critically, among the  
216 antibody effector functions, we previously observed a preferential expansion of Spike-  
217 specific opsinophagocytic activity in natural survivors of severe disease (22) and thus we  
218 profiled the Spike- and S2-specific antibody-dependent monocyte and neutrophil  
219 phagocytic profile. Limited expansion of Spike-specific antibody-dependent cellular  
220 monocyte phagocytic (ADCP) activity was observed across the Delta and Omicron  
221 breakthrough cases (**Figure 4A**). Conversely, we observed a limited S2-specific ADCP  
222 expansion within the first week of breakthrough infection in Delta breakthroughs, but a  
223 highly significant expansion of S2-specific ADCP 2-3 weeks following breakthrough .  
224 Conversely, S2-specific ADCP was already significantly expanded in Omicron-infections  
225

226 by day 7 and continued to expand over the next few weeks following breakthrough  
227 infection.

228 Antibody-mediated neutrophil phagocytosis (ADNP) has been linked to natural  
229 resolution of infection, convalescent plasma therapeutic activity, and vaccine-mediated  
230 immunity (19, 24). Interestingly, Spike-specific ADNP activity was not expanded over the  
231 first week of breakthrough infection in Delta breakthroughs, but did expand highly  
232 significantly over the following 2-3 weeks following infection. However, Spike-specific  
233 ADNP expanded more rapidly after breakthrough Omicron infection. Interestingly, S2-  
234 specific ADNP was not observed in either Delta or Omicron cases 1 week after  
235 breakthrough, but S2-specific ADNP responses expanded significantly over the next 2  
236 weeks following infection (**Figure 4B**). Neutralization expansion of Spike increased but  
237 was correlated exclusively with the RBD domain (25). That neutralization did not correlate  
238 with S2, even though titers were bolstered, further highlights the non-neutralizing activity  
239 of S2-specific IgG1 post-breakthrough (Supplementary Figure 4). Thus, these data point  
240 to a simultaneous expansion of both neutralizing and opsinophagocytic antibodies, with  
241 a slightly earlier expansion of opsinophagocytic responses that may be key to the early  
242 capture, blockade, and elimination of the virus upon transmission.

243

#### 244 *S2-expansion differences across mRNA platforms*

245 Emerging data point to differences in Pfizer/BNT162b2 and Moderna/mRNA-1273  
246 vaccine real world efficacy (26) and in immune Fc-profiles likely attributable to differences  
247 in dose, vaccine intervals, lipid-nanoparticle differences, and potential differences in  
248 mRNA chemistry (27). To determine if the 2 mRNA platforms induced a similar  
249 anamnestic response, breakthrough cases were split across individuals that received  
250 either of the mRNA vaccine platforms (**Figure 5**). Recipients of the Pfizer/BNT162b2  
251 vaccine experienced a more rapid rise in Spike-specific IgG titers following breakthrough  
252 infection, although Pfizer/BNT162b2 and mRNA-1273 vaccinees reached similar Spike-  
253 specific titers 2-3 weeks after breakthrough infection (**Figure 5A**). Conversely,  
254 Pfizer/BNT162b2 vaccinees experienced a more significant and sustained increase in S2-  
255 specific immunity following breakthrough infection compared to Moderna/mRNA-1273  
256 recipients (**Figure 5B**). However, despite this differential quantitative expansion,  
257 enhanced titer-corrected opsinophagocytic activity was observed following mRNA-1273  
258 vaccination (**Figure 5C-D**), pointing to a distinct shift in responses across the 2 vaccine  
259 platforms, with a robust quantitative increase in S2-titers following Pfizer/BNT162b2 but  
260 more functional per-S2-specific antibody response following Moderna/mRNA-1273  
261 vaccination.

262

#### 263 *Selective expansion of fusion peptide and heptad repeat 1 specific immunity*

264 To finally define whether S2-specific responses targeted particular regions of S2,  
265 we finally mapped the expanding breakthrough response across peptides spanning the  
266 S2 domain of the Spike antigen. Using peptides spanning regions across the S2-segment  
267 of the SARS-CoV-2 Spike antigen, a highly focused expansion of antibodies was noted  
268 to the second fusion peptide (FP2) and the heptad repeat 1 (HR1) (**Figure 6A**) across  
269 both Delta and Omicron breakthrough cases 7 days after breakthrough. While the  
270 response evolved to target additional regions of the S2 antigen in both groups over the  
271 first month following breakthrough infection, the FP2- and HR1-specific responses

272 remained most highly immunodominant. At a more granular level, FP2 and HR1 IgG titers  
273 were already significantly higher than observed in controls after the first week of infection  
274 across VoC breakthrough groups (**Figure 6B-C**). Moreover, these responses remained  
275 persistently higher over the following 2-3 weeks. Lastly, we probed whether responses to  
276 particular subregions within S2 were correlated with virus clearance. Comparison of  
277 SARS-CoV-2 RNA decay slopes with S2-peptide-specific IgG expansions over the course  
278 of the first 3 weeks of breakthrough infection pointed to a highly significant inverse  
279 correlation between the slope of the evolution of FP2-specific responses and viral  
280 clearance (**Figure 6D**). Additionally, S2-peptide-specific responses were also significantly  
281 associated with viral clearance, pointing to a potentially critical role of multiple S2-specific  
282 responses in the elimination of viral replication. Collectively, these data point to a common  
283 immunodominant S2 anamnestic response to FP2, and the heptad repeats that may form  
284 the basis of a rapid functional humoral response required to capture, contain, and  
285 eliminate VoCs until T cells are able to traffic, expand, and eliminate remaining virus to  
286 ultimately clear the disease.



## 287 Discussion

288 Correlates of immunity represent immunological biomarkers that are statistically  
289 enriched in individuals that exhibit protective immunity in vaccine trials (19, 28-32).  
290 Correlates may be mechanistically involved in protective immunity, but can also represent  
291 surrogates of other immunological mechanisms key to anti-pathogen control. Most  
292 correlates of immunity are defined at the time of peak immunogenicity, aimed at defining  
293 immune responses able to predict clinical outcomes. However, within most trials,  
294 infections occur over prolonged periods of time, and vaccine-induced immune responses  
295 may have waned from peak immunogenicity. Thus, the immunological markers  
296 associated with protection over time may differ from those observed at peak  
297 immunogenicity. However, the collection of samples prior to infection over time in large  
298 Phase 3 trials is cost-prohibitive. Instead, the analysis of responses that selectively  
299 expand soon after infection can offer additional insights into the mechanism(s) by which  
300 vaccine-induced immunity reacts to control a challenge.

301 Phase 3 peak immunogenicity correlates analyses pointed to a strong association  
302 between vaccine-induced Spike-specific neutralizing and binding antibody titers with  
303 protection across the mRNA platforms (6, 8). Here we profiled the post-infection  
304 immunological profiles that evolved in breakthrough infections, with a unique interest in  
305 defining whether the kinetics of breakthrough correlates of immunity were consistent  
306 across variants of concern. While an expansion of full-length Spike IgG responses was  
307 observed in both Delta and Omicron breakthrough infections, limited expansion was  
308 observed in NTD-specific titers across both groups. Instead, the majority of the Spike-  
309 specific expansion was related to a unique anamnestic expansion of early S2 FP2- and  
310 HR1-specific IgM antibodies able to leverage monocyte phagocytosis, followed by a more  
311 mature S2 FP2- and HR1-specific IgG FcR binding neutrophil recruiting response  
312 observed both in Delta and Omicron breakthroughs. Thus, despite the immunodominant  
313 vaccine-induced response to the RBD, these data point to a critical and unexpected role  
314 of S2-specific functional humoral immunity as critical anamnestic correlates of immunity  
315 across VoCs.

316 Early studies of immune correlates of natural resolution of COVID-19 pointed to a  
317 selective expansion of S2-specific functional humoral immunity in survivors of natural  
318 severe COVID-19 infection. S2-specific antibodies were noted in survivors of severe  
319 COVID-19 from the time of intensive care unique admission (22, 31). Moreover, expanded  
320 S2-specific humoral immune responses were also noted in children (32), individuals that  
321 developed milder forms of COVID-19, as well as in individuals that developed  
322 asymptomatic infections (31). Interestingly, these natural S2-specific humoral immune  
323 responses may have emerged from pre-existing common-coronavirus specific humoral  
324 immune responses, that also expanded, marked by preferential FcR-binding, among  
325 individuals with asymptomatic infection. Common  $\beta$ -coronaviruses are largely conserved  
326 in their S2 domains. S2-specific monoclonals exhibit cross-coronavirus reactivity and *in*  
327 *vivo* protection in an Fc-dependent manner (33), arguing that these less potent  
328 neutralizing antibodies target a highly conserved region of the SARS-CoV-2 Spike may  
329 depend on non-neutralizing mechanisms of action. Given the robust association between  
330 pre-existing common-coronavirus immunity and attenuated COVID-19 (32), these data  
331 point to a critical role for cross-reactive S2-specific humoral immunity in both infection and  
332 vaccine-induced immune responses.

333 The S2 includes the fusion machinery required for viral entry (34), requiring precise  
334 packaging and movement upon Spike binding to the host angiotensin-2 (ACE2) receptor.  
335 Thus, unlike other regions of the Spike antigen, the S2 is less mutable and has shown  
336 conservation across distinct VOCs, with only ~2 and 12 mutations in Delta and Omicron  
337 respectively (depending on sublineage), representing the most highly conserved region  
338 of the SARS-CoV-2 Spike antigen. However, the S2-directed response is less dominant  
339 following mRNA vaccination, likely related to the 2 proline stabilization introduced in the  
340 protein to stabilize the antigen during vaccination (35, 36). This stabilization holds S1 and  
341 S2 in a pre-fusion state, likely required to drive robust immunity to the primary target of  
342 neutralizing antibodies, the RBD. However, this stabilization also may make S2 less  
343 accessible to the immune response. Infection with the virus generates copious amounts  
344 of Spike in its inherently destabilized form. This allows immune surveillance networks to  
345 sample both S1 and S2 domains in pre- and post-fusion forms, triggering an anamnestic  
346 response. The differences in the anamnestic immunodominance of S1 and S2 may relate  
347 to the fact that S1 is presented largely as soluble protein, whereas S2 may be presented  
348 in a particulate form, due to the C-terminal transmembrane anchoring domain of the  
349 protein. Conversely, S2-responses may gain a competitive advantage due to the high  
350 degree of conservation across VoCs, able to recruit pre-existing B cells, whereas  
351 previously programmed RBD- and NTD-specific B cells may struggle to bind to the  
352 incoming VoC due to significant antigenic variation (1, 2, 4). However, despite the  
353 enhanced sequence conservation between the vaccine strain and Delta compared to  
354 Omicron, S2-specific immunity expanded in both Delta and Omicron breakthroughs,  
355 suggesting that S2-specific anamnestic correlates may be key to protection across VoCs.

356 Differences in dose, vaccination interval, lipid-nanoparticle composition, and  
357 mRNA chemistry all contribute to differences in antibody subclass/isotype and Fc-  
358 receptor binding profiles across mRNA vaccines (27). Here we observed differences in  
359 the anamnestic response following Pfizer/BNT162b2 and Moderna/mRNA-1273  
360 immunization, linked to a higher magnitude expansion of anamnestic immunity in  
361 Pfizer/BNT162b2 vaccinees and a functional expansion in Moderna/mRNA1273  
362 vaccinees, although both breakthrough profiles resulted in an expansion of S2-specific  
363 immunity. These differences may be related to real-world efficacy differences across the  
364 platforms, with reduced breakthrough infections observed in Moderna/mRNA1273  
365 vaccinees, potentially related to higher IgA titers and functional humoral immunity (REF)  
366 that may provide a more robust barrier against infection at the mucosal barrier. However,  
367 the expansion of S2-specific immunity following both vaccines, focused on FP2 and HR1,  
368 may be related to their accessible positions on the Spike antigen (37-39). Thus, strategies  
369 to boost functional humoral immunity to these critical sights may represent a promising  
370 future strategy to maintain long-term protection against severe disease and death against  
371 current and future VoCs. Whether these S2-specific responses can work in concert with  
372 T cells that also target conserved regions of the SARS-CoV-2 Spike remains unclear (12);  
373 however, these responses point to important, unexpected targets of the immune response  
374 that may be key to the durable protection against disease severity. Moreover, these  
375 regions that show higher conservation between VoCs, and  $\beta$ -coronaviruses in general,  
376 that are expanded post-infection could be viewed as rational vaccination booster targets.

## 377 **Methods**

378

### 379 *Study Approval*

380 Approval for study for breakthrough COVID-19 at Massachusetts General Brigham was  
381 approved under protocol 2021P000812 by the Mass General Brigham IRB. For this  
382 cohort, symptomatic COVID-19 patients seen for outpatient care were recruited based  
383 on a positive SARS-CoV-2 test (**Table S1**). Sequencing from anterior nasal swabs was  
384 performed for VoC identification. The use of healthy donor blood for cellular functional  
385 assays is approved under protocol 2021P002628 by the Mass General Institutional IRB.

386 The Hospitalized or Ambulatory Adults with Respiratory Viral Infections (HAARVI) study  
387 was approved by the University of Washington Human Subjects Division Institutional  
388 Review Board (STUDY00000959).

### 389 *Antigens*

390 All antigens and peptides used in this study are listed in **Table S2** and **Table S3**. The  
391 protein antigens were received in lyophilized powder form and resuspended in water to  
392 a final concentration of 0.5 mg/mL. Peptides were received in solution and, if necessary,  
393 were buffer exchanged using Zeba-Spin columns (ThermoFisher, USA).

### 394 *Immunoglobulin isotype and Fc receptor binding*

395 Sera was collected from participants at two time points post-COVID-19 diagnosis, with  
396 the first time point being  $6.3 \pm 2.8$  days post-observed start date, and  $18.8 \pm 2.9$  days  
397 post-observed start date. The two groups were clustered together for analyses and  
398 classified as < 1 Week and 2-3 Weeks.

399  
400 Systems serology for antigen-specific recognition was done using custom multiplex  
401 magnetic Luminex beads (Luminex Corp, TX, USA) as previously as previously described  
402 (21). Antigens and peptides were coupled to beads through carbodiimide-NHS ester-  
403 coupling chemistry. The antigen- or peptide-coupled beads were incubated with heat-  
404 inactivated serum (1:100 for IgG2, IgG3, IgG4, IgM, and IgA1, 1:250 for IgG1, and 1:750  
405 for Fc $\gamma$ -receptor binding) overnight at 4°C in 384 well plates (Greiner Bio-One, Germany).  
406 Secondary antibodies were PE-conjugated and incubated with samples at room  
407 temperature for 1 hour at a 1:100 dilution in sterile-filtered Assay Buffer (1X PBS, pH =  
408 7.4, 0.1 % BSA, 0.05 % Tween – 20). For Fc $\gamma$ -receptors, PE-streptavidin (Agilent  
409 Technologies, CA, USA) at a 1:1000 dilution.

410  
411 For flow cytometry analysis, the IQue Screener PLUS cytometer (IntelliCyt) was used  
412 using customized gating for each bead region. Fluorescence in the BL2 channel was  
413 quantified and exported into .csv files and subsequently analyzed (see below).

414

### 415 *Viral loads quantitation*

416 SARS-CoV-2 RNA was extracted and quantified as previously described (20, 40). VoC  
417 identification through sequencing was done using a previously validated method (25).  
418 Peak viral loads for each patient were quantified and the mean peak viral loads between  
419 VoC was calculated.

#### 420 *Evaluation of antibody-mediated functions*

421 Antibody-dependent cellular phagocytosis (ADCP) by monocytes and neutrophil  
422 phagocytosis (ADNP) were quantified using a validated, flow cytometry-based bead  
423 phagocytic assay. Fluorescently labeled microspheres were coupled to antigens through  
424 biotinylation and conjugation to neutravidin beads. Diluted and heat-inactivated serum  
425 samples were incubated with the antigen-coupled neutravidin beads to create a pre-  
426 immune complex. The solution was then incubated with THP-1 monocytes (ATCC,  
427 Manassas, USA) or primary-derived neutrophils (21). For ADNP, cells were stained with  
428 anti-CD66b Pac blue antibody to calculate the percentage of CD66b+ neutrophils. Cells  
429 were fixed with 4% paraformaldehyde. Microsphere uptake was quantified by the  
430 percentage of microsphere-positive cells x MFI of microsphere-positive cells.

#### 431 *Statistical Analyses*

432 Data visualizations and analysis were done using R Studio V 1.4.1103 or GraphPad  
433 Prism. Box and whisker plots were generated using ggplot showing the mean and  
434 standard deviation for each group as factors. An initial ANOVA was performed to  
435 identify significant groupings. A Wilcoxon-rank sum test and pairwise T-tests were used  
436 to determine grouping between two groups. For all analyses \* stands for  $p < 0.05$ , and  
437 \*\* stands for  $p < 0.01$ . All codes and scripts are available upon request and no original  
438 code was created for this manuscript.

439

440

441 **Figure Legends**

442 **Figure 1. Recognition and expansion of Spike and Spike subdomains post-**  
443 **breakthrough.** (A) Full-length Spike (D614G) was assayed for antibody recognition in  
444 non-breakthrough, vaccinated controls (white, column 1), vaccinated Delta <1 Week  
445 (yellow, column 2) or 2-3 Weeks post-breakthrough (orange, column 3), and vaccinated  
446 Omicron <1 week (blue, column 4) or 2-3 Weeks post-breakthrough (dark blue, column  
447 5). (B) Same as A, but for the receptor-binding domain (RBD). (C) Same as B, but for the  
448 N-terminal domain (NTD). (D) Same as B, but for the S2 domain. (E) Same as A, but for  
449 Fcγ-receptor (FcγR) recognition of full-length Spike. (F) Same as E, but for the RBD. (G)  
450 Same as F, but for the NTD. (H) Same as F, but for the S2 domain. \* =  $p < 0.05$ , and \*\* =  
451  $p < 0.01$  for all panels.

452  
453 **Figure 2. Conserved regions of Spike are selectively expanded in breakthrough**  
454 **cases.** (A) Fold changes in IgG1 binding of the subdomains of Spike (NTD in black, RBD  
455 in blue, and S2 in red) for vaccinated, Delta breakthrough cases at <1 week or 2-3 Weeks  
456 post-breakthrough. (B) Same as A, but for vaccinated Omicron breakthrough cases. (C)  
457 Fold changes in IgG1 binding of the full-length Spikes from VoC in Delta breakthrough  
458 cases. (D) Same as C, but for Omicron breakthrough cases. (E) Fold changes in IgG1  
459 binding of the Spike of common CoV Spikes in Delta breakthrough infections at < 1 Week  
460 or 2-3 Weeks post-breakthrough. SARS-CoV-2 nucleocapsid (N) is used as a control for  
461 infection. (F) Same as C, but for Omicron breakthroughs.  
462 \* =  $p < 0.05$ , and \*\* =  $p < 0.01$  for all panels.

463  
464 **Figure 3. Expansion of S2 recognition is a marker for breakthrough COVID-19.** (A)  
465 Partial least squares determinant analysis (PLS-DA) clustering of vaccinated, controls  
466 (black), and vaccinated Delta breakthrough (orange) immunological signatures. Shown  
467 are the clusters at 2-3 Weeks post-breakthrough. (B) Same as A, but for vaccinated  
468 Omicron breakthrough (blue) immunological signatures. (C) Ranked sum of identified  
469 features in the PLS-DA by subdomain. Shown is the distance on LV1, which was the  
470 major axis of separation by both Delta and Omicron breakthroughs at 2-3 Weeks post-  
471 breakthrough.

472  
473 **Figure 4. Expansion of S2 recognition is functionally linked to antibody-mediated**  
474 **opsinophagocytic activity.** (A) Antibody-mediated cellular phagocytosis (ADCP) by  
475 monocytes was quantified using sera from vaccinated, non-breakthrough controls  
476 (column 1, white), vaccinated Delta breakthroughs at < 1 Week (yellow, column 2) or 2-3  
477 Weeks post-breakthrough (orange, column 3), and vaccinated Omicron breakthroughs at  
478 < 1 Week (blue, column 4) or 2-3 Weeks post breakthrough (dark blue, column 5) for full-  
479 length Spike (left) and for the S2 domain alone (right). (B) Same as A, but for antibody-  
480 dependent neutrophil phagocytosis (ADNP) isolated from healthy donors. \* =  $p < 0.05$ ,  
481 and \*\* =  $p < 0.01$  for all panels.

482  
483 **Figure 5. Breakthrough COVID-19 in mRNA vaccinated individuals results in**  
484 **distinct S2 functional expansions.** (A) Fold changes in full-length Spike IgG1 in  
485 breakthrough COVID-19 cases in individuals vaccinated with the BNT162b2 (blue) or the  
486 mRNA1273 (red) mRNA vaccines at <1 Week or 2-3 Weeks post-breakthrough. (B) Fold

487 changes in S2-specific IgG1 in breakthrough COVID-19 cases in BNT162b2 (blue) or the  
488 mRNA1273 (red) mRNA vaccine recipients at <1 Week or 2-3 Weeks post-breakthrough.  
489 (C) ADCP functional units for individuals vaccinated with BNT162b2 (blue) or the  
490 mRNA1273 (red) mRNA vaccine against full-length Spike or S2. Functional units were  
491 quantified by taking the endocytic score divided by the MFI of IgG1 towards the antigen.  
492 (D) Same as C, but for ADN\* =  $p < 0.05$ , and \*\* =  $p < 0.01$  for all panels.

493

494 **Figure 6. Immunodominant expansion of S2 is focused to the fusion peptide and**  
495 **heptad repeat region 1 for VoC breakthroughs.** (A) Peptides spanning subregions of  
496 S2 were assayed for IgG1 expansion post-breakthrough by Delta (left two columns) and  
497 Omicron (right two columns) during the <1 Week and 2-3 Weeks post-breakthrough  
498 responses; heatmap legend is shown on the right. (B) The fusion peptide 2 (FP2) was  
499 assayed for IgG1 recognition in non-breakthrough, vaccinated controls (white, column  
500 1), vaccinated Delta <1 Week (yellow, column 2) or 2-3 Weeks post-breakthrough  
501 (orange, column 3), and vaccinated Omicron <1 week (blue, column 4) or 2-3 Weeks  
502 post-breakthrough (dark blue, column 5). (C) Same as B, but for heptad repeat 1  
503 subregion 6 (HR1-6). (D) Correlations between viral loads and IgG1 S2 peptide  
504 recognition for 2-3 Weeks post-breakthrough samples. \* =  $p < 0.05$ .

505

506

507 **Acknowledgments**

508 We thank Mark and Lisa Schwartz, Terry and Susan Ragon, and the SAMANA Kay  
509 MGH Research Scholars award for their support. GA also receives funding from the  
510 Massachusetts Consortium on Pathogen Readiness (MassCPR), the Gates Global  
511 Health Vaccine Accelerator Platform, and the NIH (3R37AI080289-11S1, R01AI146785,  
512 U19AI42790-01, U19AI135995-02, U19AI42790-01, P01AI1650721, U01CA260476 –  
513 01, CIVIC75N93019C00052).

514

515 **Disclosure**

516 Galit Alter is a founder/equity holder in Seroymx Systems and Leyden Labs. GA has  
517 served as a scientific advisor for Sanofi Vaccines. GA has collaborative agreements  
518 with GSK, Merck, Abbvie, Sanofi, Medicago, BioNtech, Moderna, BMS, Novavax, SK  
519 Biosciences, Gilead, and Sanaria.

520

521 **Figure 1**

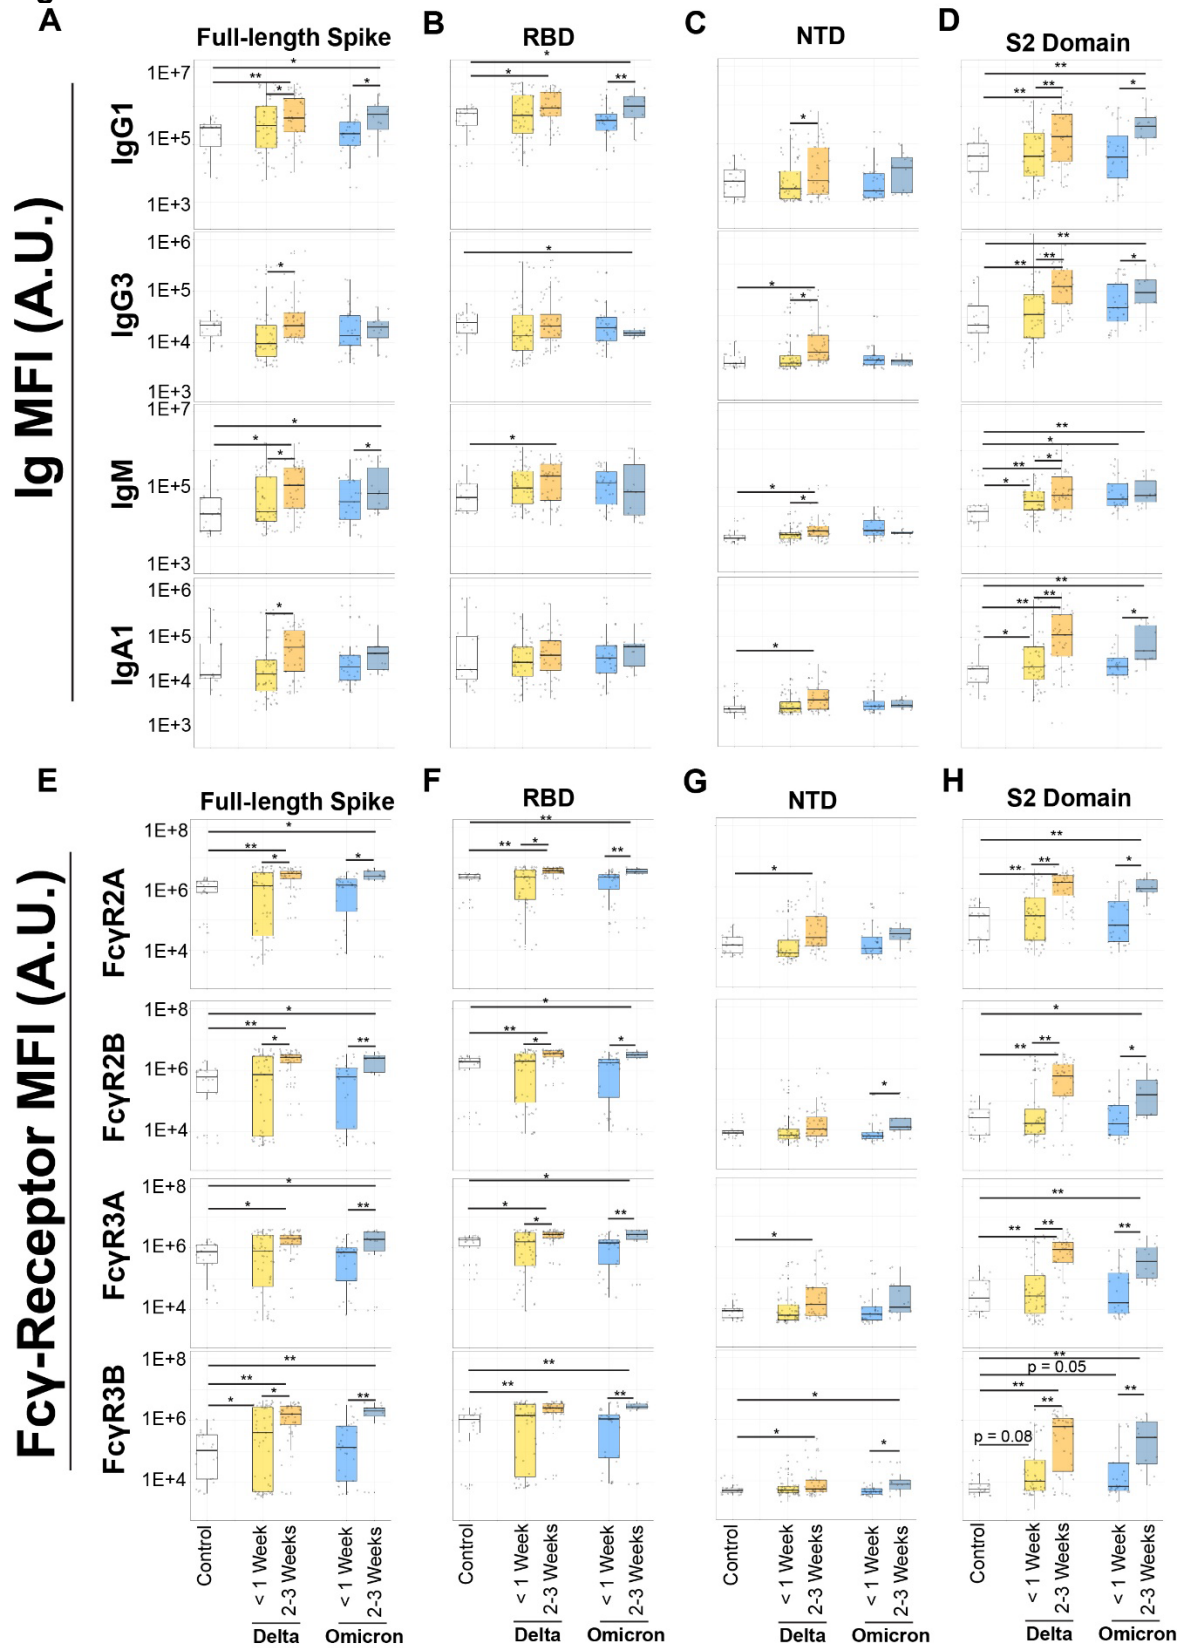

522  
523



524

## Figure 2

**A**

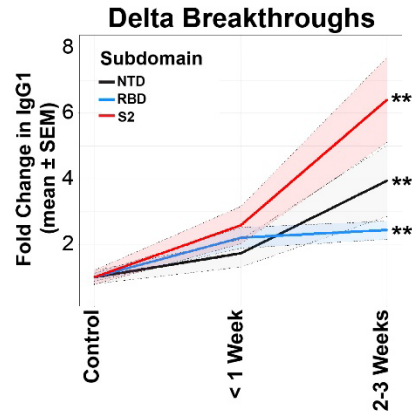

**C**

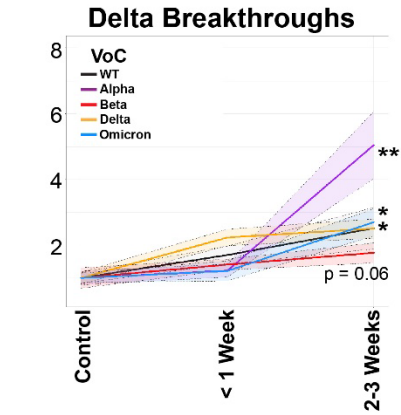

**E**

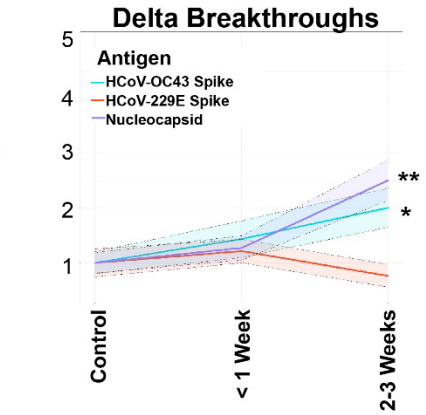

**B**

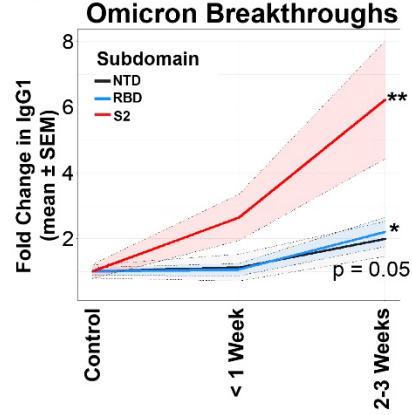

**D**

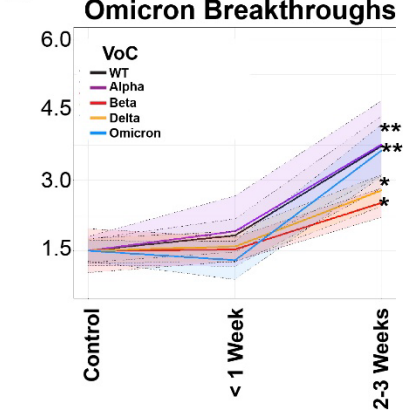

**F**

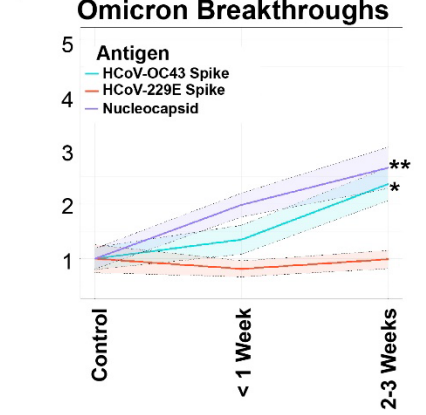

525

526

527 **Figure 3**  
**A**

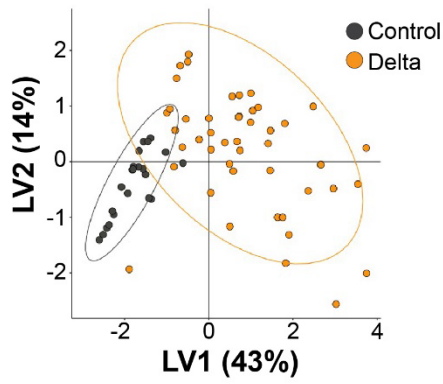

**B**

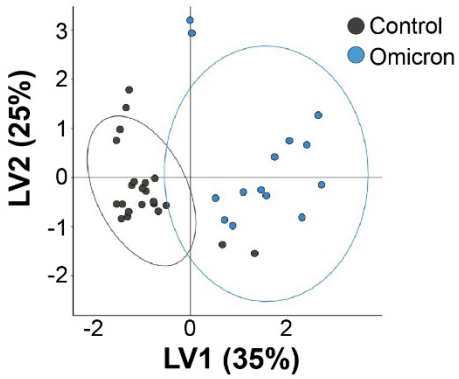

**C**

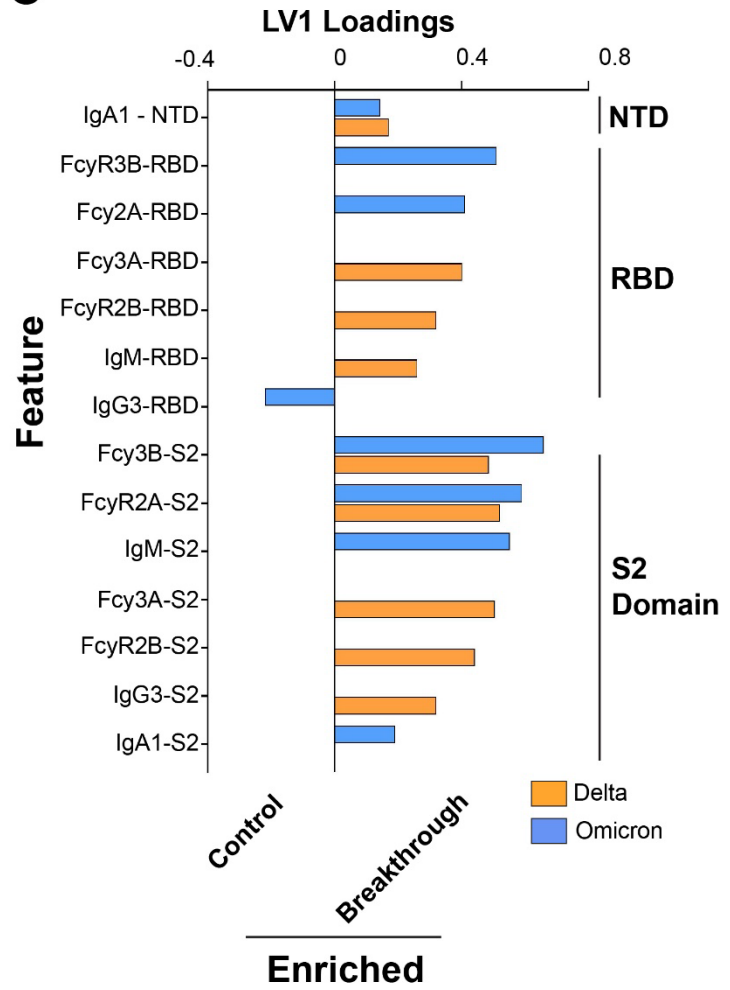

528  
529

530 **Figure 4**

**A**

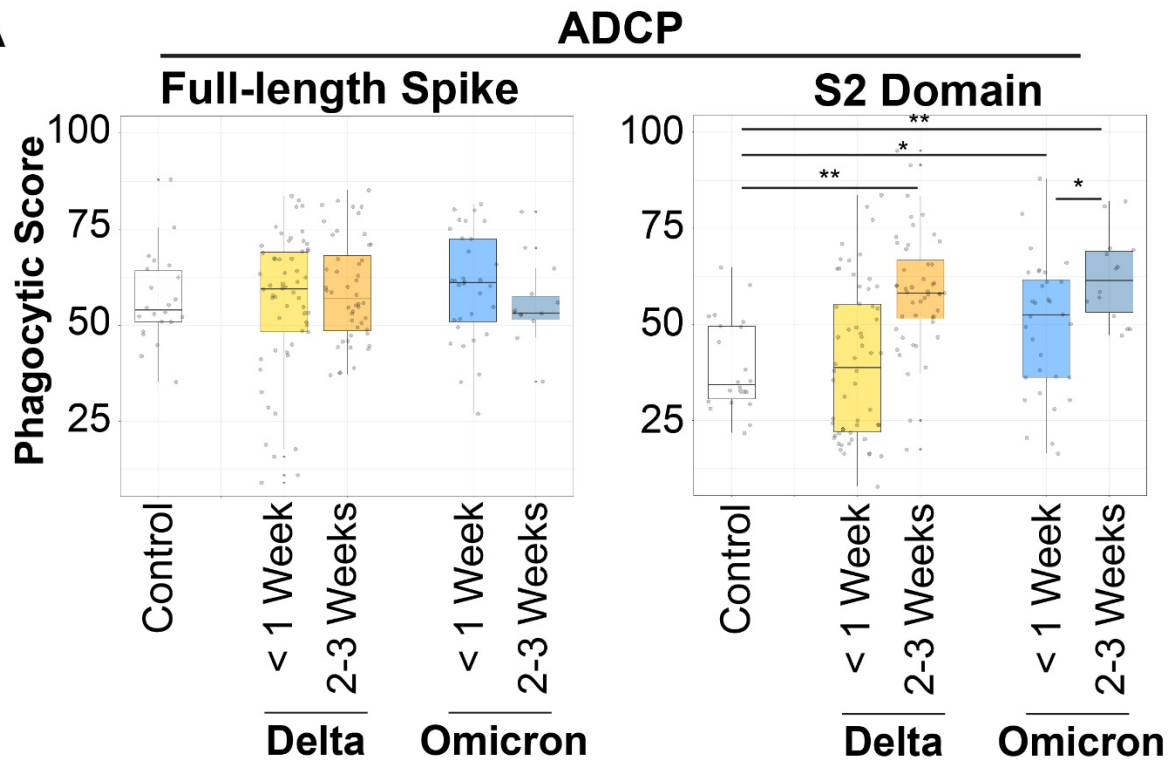

**B**

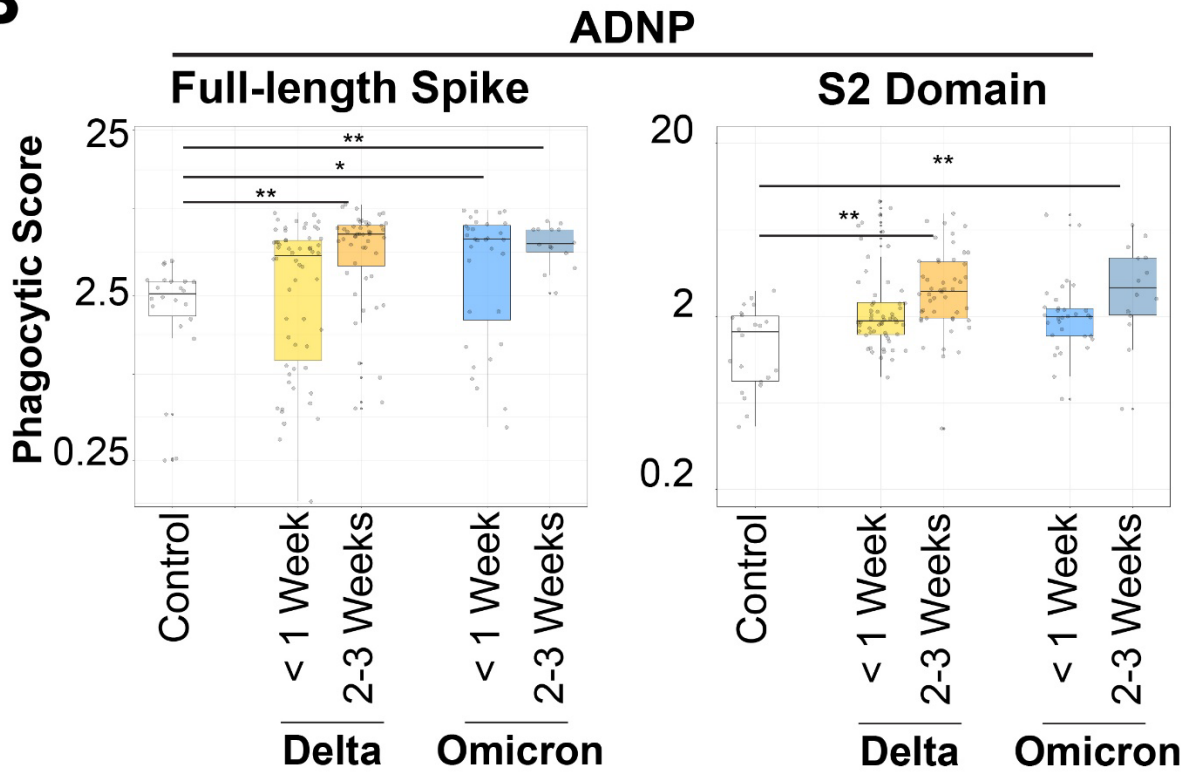

531  
532

533

Figure 5

**A**

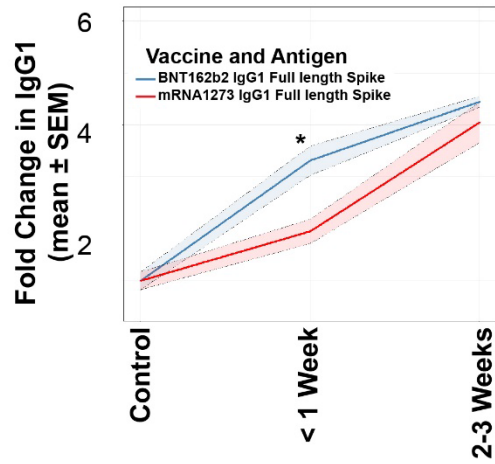

**B**

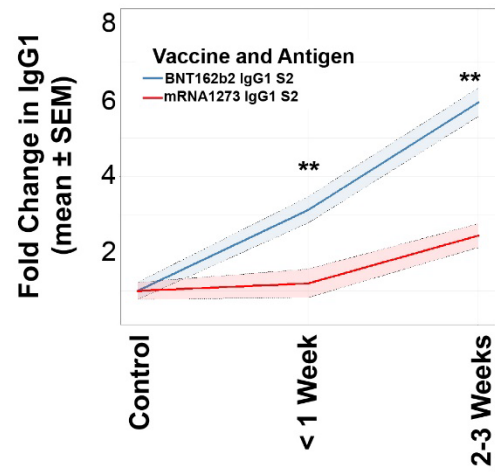

**C**

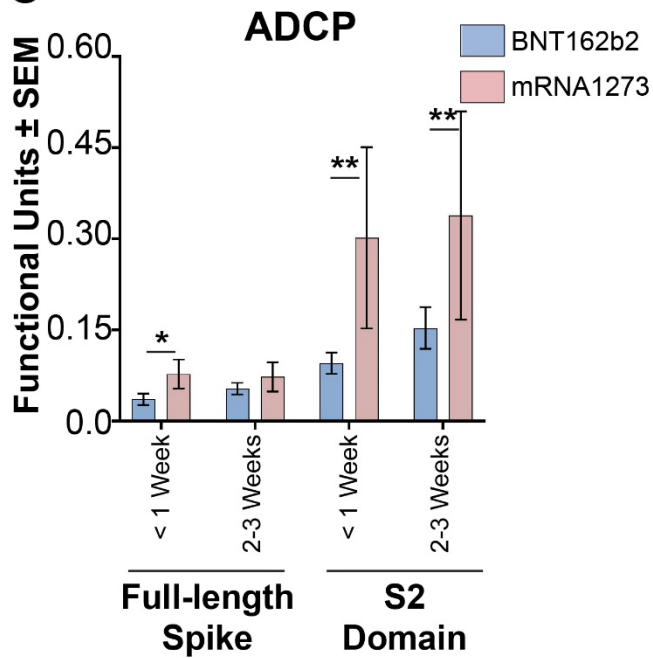

**D**

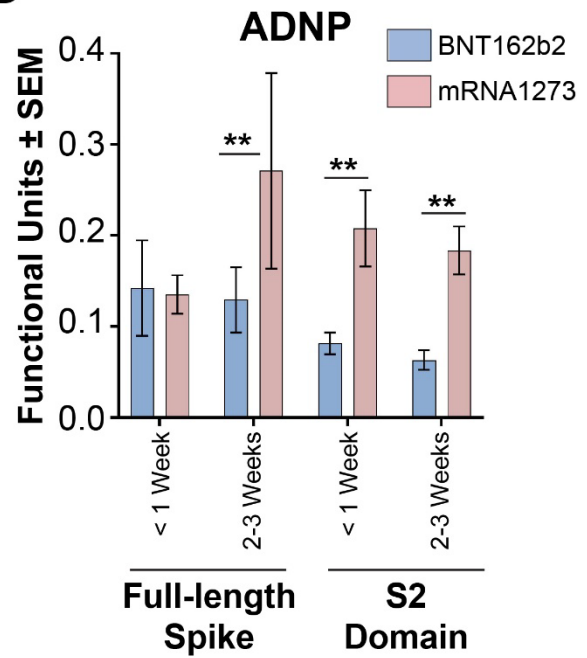

534

535

536  
537

## Figure 6

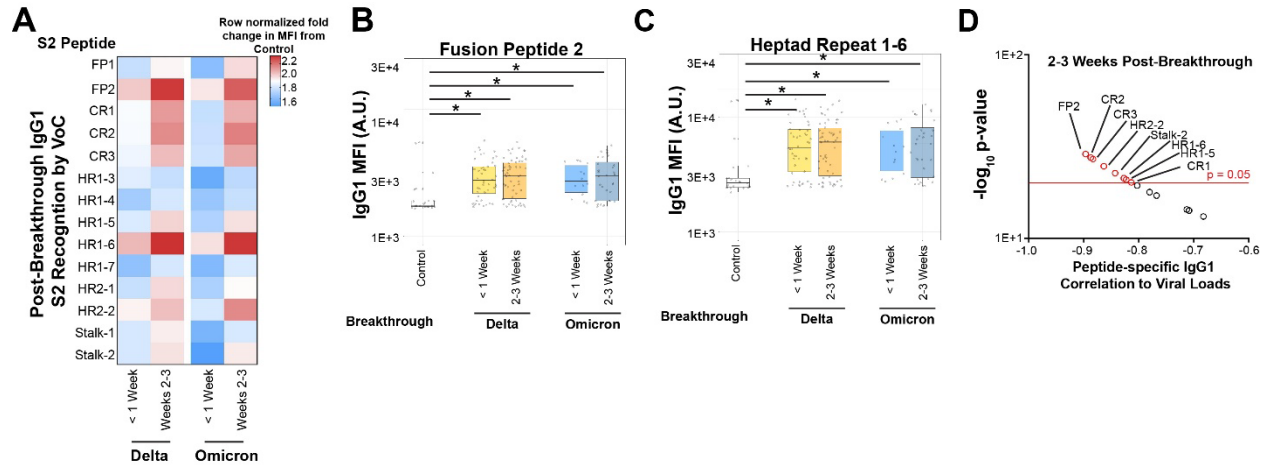

538

## 539 References

540

- 541 1. Y. Cao *et al.*, Omicron escapes the majority of existing SARS-CoV-2 neutralizing antibodies.  
542 *Nature*, (2021).
- 543 2. D. Planas *et al.*, Considerable escape of SARS-CoV-2 Omicron to antibody neutralization.  
544 *Nature*, (2021).
- 545 3. J. Singh, S. A. Rahman, N. Z. Ehtesham, S. Hira, S. E. Hasnain, SARS-CoV-2 variants of  
546 concern are emerging in India. *Nat Med* **27**, 1131-1133 (2021).
- 547 4. R. Viana *et al.*, Rapid epidemic expansion of the SARS-CoV-2 Omicron variant in southern  
548 Africa. *Nature*, (2022).
- 549 5. A. S. Luring *et al.*, Clinical severity of, and effectiveness of mRNA vaccines against, covid-  
550 19 from omicron, delta, and alpha SARS-CoV-2 variants in the United States: prospective  
551 observational study. *BMJ* **376**, e069761 (2022).
- 552 6. L. R. Baden *et al.*, Efficacy and Safety of the mRNA-1273 SARS-CoV-2 Vaccine. *N Engl J Med*  
553 **384**, 403-416 (2021).
- 554 7. E. J. Haas *et al.*, Impact and effectiveness of mRNA BNT162b2 vaccine against SARS-CoV-  
555 2 infections and COVID-19 cases, hospitalisations, and deaths following a nationwide  
556 vaccination campaign in Israel: an observational study using national surveillance data.  
557 *Lancet* **397**, 1819-1829 (2021).
- 558 8. V. V. Edara, W. H. Hudson, X. Xie, R. Ahmed, M. S. Suthar, Neutralizing Antibodies Against  
559 SARS-CoV-2 Variants After Infection and Vaccination. *JAMA* **325**, 1896-1898 (2021).
- 560 9. A. Pegu *et al.*, Durability of mRNA-1273 vaccine-induced antibodies against SARS-CoV-2  
561 variants. *Science* **373**, 1372-1377 (2021).
- 562 10. J. Liu *et al.*, BNT162b2-elicited neutralization of B.1.617 and other SARS-CoV-2 variants.  
563 *Nature* **596**, 273-275 (2021).
- 564 11. Z. Wang *et al.*, mRNA vaccine-elicited antibodies to SARS-CoV-2 and circulating variants.  
565 *Nature* **592**, 616-622 (2021).
- 566 12. R. Keeton *et al.*, T cell responses to SARS-CoV-2 spike cross-recognize Omicron. *Nature*,  
567 (2022).
- 568 13. Y. C. Bartsch *et al.*, Omicron variant Spike-specific antibody binding and Fc activity are  
569 preserved in recipients of mRNA or inactivated COVID-19 vaccines. *Sci Transl Med* **14**,  
570 eabn9243 (2022).
- 571 14. K. McMahan *et al.*, Correlates of protection against SARS-CoV-2 in rhesus macaques.  
572 *Nature* **590**, 630-634 (2021).
- 573 15. W. F. Garcia-Beltran *et al.*, mRNA-based COVID-19 vaccine boosters induce neutralizing  
574 immunity against SARS-CoV-2 Omicron variant. *Cell*, (2022).
- 575 16. R. Pajon *et al.*, SARS-CoV-2 Omicron Variant Neutralization after mRNA-1273 Booster  
576 Vaccination. *N Engl J Med* **386**, 1088-1091 (2022).
- 577 17. T. Nyberg *et al.*, Comparative analysis of the risks of hospitalisation and death associated  
578 with SARS-CoV-2 omicron (B.1.1.529) and delta (B.1.617.2) variants in England: a cohort  
579 study. *Lancet* **399**, 1303-1312 (2022).
- 580 18. K. S. Corbett *et al.*, Immune correlates of protection by mRNA-1273 vaccine against SARS-  
581 CoV-2 in nonhuman primates. *Science* **373**, eabj0299 (2021).

- 582 19. C. Atyeo *et al.*, Distinct Early Serological Signatures Track with SARS-CoV-2 Survival.  
583 *Immunity* **53**, 524-532.e524 (2020).
- 584 20. J. Boucau *et al.*, Duration of viable virus shedding in SARS-CoV-2 omicron variant infection  
585 (MedRxiv, 2022).
- 586 21. E. P. Brown *et al.*, Multiplexed Fc array for evaluation of antigen-specific antibody effector  
587 profiles. *J Immunol Methods* **443**, 33-44 (2017).
- 588 22. T. Zohar, G. Alter, Dissecting antibody-mediated protection against SARS-CoV-2. *Nat Rev*  
589 *Immunol* **20**, 392-394 (2020).
- 590 23. S. Temmam *et al.*, Bat coronaviruses related to SARS-CoV-2 and infectious for human cells.  
591 *Nature* **604**, 330-336 (2022).
- 592 24. C. B. Karsten *et al.*, A versatile high-throughput assay to characterize antibody-mediated  
593 neutrophil phagocytosis. *J Immunol Methods* **471**, 46-56 (2019).
- 594 25. A. C. Walls *et al.*, SARS-CoV-2 breakthrough infections elicit potent, broad, and durable  
595 neutralizing antibody responses. *Cell* **185**, 872-880.e873 (2022).
- 596 26. H. N. Altarawneh *et al.*, Effects of Previous Infection and Vaccination on Symptomatic  
597 Omicron Infections. *N Engl J Med*, (2022).
- 598 27. P. Kaplonek *et al.*, mRNA-1273 and BNT162b2 COVID-19 vaccines elicit antibodies with  
599 differences in Fc-mediated effector functions. *Sci Transl Med* **14**, eabm2311 (2022).
- 600 28. C. Lucas *et al.*, Delayed production of neutralizing antibodies correlates with fatal COVID-  
601 19. *Nat Med* **27**, 1178-1186 (2021).
- 602 29. W. F. Garcia-Beltran *et al.*, COVID-19-neutralizing antibodies predict disease severity and  
603 survival. *Cell* **184**, 476-488.e411 (2021).
- 604 30. Y. C. Bartsch *et al.*, Humoral signatures of protective and pathological SARS-CoV-2  
605 infection in children. *Nat Med* **27**, 454-462 (2021).
- 606 31. P. Kaplonek *et al.*, Early cross-coronavirus reactive signatures of humoral immunity  
607 against COVID-19. *Sci Immunol* **6**, eabj2901 (2021).
- 608 32. K. W. Ng *et al.*, Preexisting and de novo humoral immunity to SARS-CoV-2 in humans.  
609 *Science* **370**, 1339-1343 (2020).
- 610 33. C. Wang *et al.*, A conserved immunogenic and vulnerable site on the coronavirus spike  
611 protein delineated by cross-reactive monoclonal antibodies. *Nat Commun* **12**, 1715  
612 (2021).
- 613 34. M. Hoffmann *et al.*, SARS-CoV-2 Cell Entry Depends on ACE2 and TMPRSS2 and Is Blocked  
614 by a Clinically Proven Protease Inhibitor. *Cell* **181**, 271-280.e278 (2020).
- 615 35. K. S. Corbett *et al.*, SARS-CoV-2 mRNA vaccine design enabled by prototype pathogen  
616 preparedness. *Nature* **586**, 567-571 (2020).
- 617 36. J. Pallesen *et al.*, Immunogenicity and structures of a rationally designed prefusion MERS-  
618 CoV spike antigen. *Proc Natl Acad Sci U S A* **114**, E7348-E7357 (2017).
- 619 37. T. Tang, M. Bidon, J. A. Jaimes, G. R. Whittaker, S. Daniel, Coronavirus membrane fusion  
620 mechanism offers a potential target for antiviral development. *Antiviral Res* **178**, 104792  
621 (2020).
- 622 38. D. Wrapp *et al.*, Cryo-EM structure of the 2019-nCoV spike in the prefusion conformation.  
623 *Science* **367**, 1260-1263 (2020).
- 624 39. A. C. Walls *et al.*, Structure, Function, and Antigenicity of the SARS-CoV-2 Spike  
625 Glycoprotein. *Cell*, (2020).

- 626 40. M. J. Siedner *et al.*, Duration of viral shedding and culture positivity with postvaccination  
627 SARS-CoV-2 delta variant infections. *JCI Insight* **7**, (2022).  
628  
629
